# Supplementary material
Source: publisher site journal article supplement (http://kjim.org/upload/media/kjim-2022-215-Supplementary-Table-1.pdf)
Supplement: Supplementary file 1 [file kjim-2022-215-Supplementary-Table-1.pdf]

**Supplementary Table 1. List of comorbidities**

| Category                                                           | Category name                             | Disease                                                                                              |
|--------------------------------------------------------------------|-------------------------------------------|------------------------------------------------------------------------------------------------------|
| Category I                                                         | Certain infectious and parasitic diseases | Arthropod-borne viral fevers and viral hemorrhagic fevers                                            |
|                                                                    |                                           | Bacterial, viral and other infectious agents                                                         |
|                                                                    |                                           | Certain zoonotic bacterial diseases                                                                  |
|                                                                    |                                           | Chronic hepatitis B                                                                                  |
|                                                                    |                                           | Helminthiases                                                                                        |
|                                                                    |                                           | Human immunodeficiency virus (HIV) disease                                                           |
|                                                                    |                                           | Infections with a predominantly sexual mode of transmission                                          |
|                                                                    |                                           | Intestinal infectious diseases                                                                       |
|                                                                    |                                           | Mycoses                                                                                              |
|                                                                    |                                           | Other bacterial diseases                                                                             |
|                                                                    |                                           | Other diseases caused by chlamydia                                                                   |
|                                                                    |                                           | Other infectious diseases                                                                            |
|                                                                    |                                           | Other spirochetal diseases                                                                           |
|                                                                    |                                           | Other viral diseases                                                                                 |
|                                                                    |                                           | Pediculosis, acariasis and other infestations                                                        |
|                                                                    |                                           | Protozoal diseases                                                                                   |
|                                                                    |                                           | Rickettsioses                                                                                        |
|                                                                    |                                           | Sequelae of infectious and parasitic diseases                                                        |
|                                                                    |                                           | Tuberculosis                                                                                         |
|                                                                    |                                           | Viral hepatitis                                                                                      |
| Viral infections characterized by skin and mucous membrane lesions |                                           |                                                                                                      |
| Viral infections of the central nervous system                     |                                           |                                                                                                      |
| Category II                                                        | Neoplasms                                 | Benign neoplasms                                                                                     |
|                                                                    |                                           | In situ neoplasms                                                                                    |
|                                                                    |                                           | Malignant neoplasm of breast                                                                         |
|                                                                    |                                           | Malignant neoplasms of bone and articular cartilage                                                  |
|                                                                    |                                           | Malignant neoplasms of digestive organs                                                              |
|                                                                    |                                           | Malignant neoplasms of eye, brain and other parts of central nervous system                          |
|                                                                    |                                           | Malignant neoplasms of female genital organs                                                         |
|                                                                    |                                           | Malignant neoplasms of ill-defined, secondary and unspecified sites                                  |
|                                                                    |                                           | Malignant neoplasms of independent (primary) multiple sites                                          |
|                                                                    |                                           | Malignant neoplasms of lip, oral cavity and pharynx                                                  |
|                                                                    |                                           | Malignant neoplasms of male genital organs                                                           |
|                                                                    |                                           | Malignant neoplasms of mesothelial and soft tissue                                                   |
|                                                                    |                                           | Malignant neoplasms of respiratory and intrathoracic organs                                          |
|                                                                    |                                           | Malignant neoplasms of thyroid and other endocrine glands                                            |
|                                                                    |                                           | Malignant neoplasms of urinary tract                                                                 |
|                                                                    |                                           | Malignant neoplasms, stated or presumed to be primary, of lymphoid, hematopoietic and related tissue |
|                                                                    |                                           | Melanoma and other malignant neoplasms of skin                                                       |
|                                                                    |                                           | Neoplasms of uncertain or unknown behavior                                                           |

**Supplementary Table 1. Continued**

| Category     | Category name                                                                                      | Disease                                                                                                                                                                                                                                                                                                                                                                                                                                                                                                                                                                                                                                                                                                             |
|--------------|----------------------------------------------------------------------------------------------------|---------------------------------------------------------------------------------------------------------------------------------------------------------------------------------------------------------------------------------------------------------------------------------------------------------------------------------------------------------------------------------------------------------------------------------------------------------------------------------------------------------------------------------------------------------------------------------------------------------------------------------------------------------------------------------------------------------------------|
| Category III | Disease of the blood and blood-forming organs and certain disorders involving the immune mechanism | <ul style="list-style-type: none"> <li>Aplastic and other anemias</li> <li>Certain disorders involving the immune mechanism</li> <li>Coagulation defects, purpura and other hemorrhagic conditions</li> <li>Hemolytic anemias</li> <li>Nutritional anemias</li> <li>Other diseases of blood and blood-forming organs</li> </ul>                                                                                                                                                                                                                                                                                                                                                                                     |
| Category IV  | Endocrine, nutritional and metabolic disease                                                       | <ul style="list-style-type: none"> <li>Diabetes mellitus</li> <li>Disorders of other endocrine glands</li> <li>Disorders of thyroid gland</li> <li>Dyslipidemia</li> <li>Malnutrition</li> <li>Metabolic disorders</li> <li>Obesity and other hyperalimentation</li> <li>Other disorders of glucose regulation and pancreatic internal secretion</li> <li>Other nutritional deficiencies</li> </ul>                                                                                                                                                                                                                                                                                                                 |
| Category V   | Mental and behavioral disorders                                                                    | <ul style="list-style-type: none"> <li>Behavioral and emotional disorders with onset usually occurring in childhood and adolescence</li> <li>Behavioral syndromes associated with physiological disturbances and physical factors</li> <li>Disorders of adult personality and behavior</li> <li>Disorders of psychological development</li> <li>Mental and behavioral disorders due to psychoactive substance use</li> <li>Mental retardation</li> <li>Mood (affective) disorders</li> <li>Neurotic, stress-related and somatoform disorders</li> <li>Organic, including symptomatic, mental disorders</li> <li>Schizophrenia, schizotypal and delusional disorders</li> <li>Unspecified mental disorder</li> </ul> |
| Category VI  | Diseases of the nervous system                                                                     | <ul style="list-style-type: none"> <li>Cerebral palsy and other paralytic syndromes</li> <li>Demyelinating diseases of the central nervous system</li> <li>Diseases of myoneural junction and muscle</li> <li>Episodic and paroxysmal disorders</li> <li>Extrapyramidal and movement disorders</li> <li>Inflammatory diseases of the central nervous system</li> <li>Nerve, nerve root and plexus disorders</li> <li>Other degenerative diseases of the nervous system</li> <li>Other disorders of the nervous system</li> <li>Polyneuropathies and other disorders of the peripheral nervous system</li> <li>Systemic atrophies primarily affecting the central nervous system</li> </ul>                          |
| Category VII | Diseases of the eye and adnexa                                                                     | <ul style="list-style-type: none"> <li>Disorders of choroid and retina</li> <li>Disorders of conjunctiva</li> <li>Disorders of eyelid, lacrimal system and orbit</li> </ul>                                                                                                                                                                                                                                                                                                                                                                                                                                                                                                                                         |

**Supplementary Table 1. Continued**

| Category      | Category name                           | Disease                                                                                                                                                                                                                                                                                                                                                                                                                                                       |
|---------------|-----------------------------------------|---------------------------------------------------------------------------------------------------------------------------------------------------------------------------------------------------------------------------------------------------------------------------------------------------------------------------------------------------------------------------------------------------------------------------------------------------------------|
|               |                                         | Disorders of lens<br>Disorders of ocular muscles, binocular movement, accommodation and refraction<br>Disorders of optic nerve and visual pathways<br>Disorders of sclera, cornea, iris and ciliary body<br>Disorders of vitreous body and globe<br>Glaucoma<br>Other disorders of eye and adnexa<br>Visual disturbances and blindness                                                                                                                        |
| Category VIII | Diseases of the ear and mastoid process | Diseases of external ear<br>Diseases of inner ear<br>Diseases of middle ear and mastoid<br>Other disorders of ear                                                                                                                                                                                                                                                                                                                                             |
| Category IX   | Diseases of the circulatory system      | Acute rheumatic fever<br>Cerebrovascular diseases<br>Chronic rheumatic heart diseases<br>Diseases of arteries, arterioles and capillaries<br>Diseases of veins, lymphatic vessels and lymph nodes, not elsewhere classified<br>Hypertension<br>Hypertensive diseases<br>Ischemic heart diseases<br>Other and unspecified disorders of the circulatory system<br>Other forms of heart disease<br>Pulmonary heart disease and diseases of pulmonary circulation |
| Category X    | Diseases of the respiratory system      | Acute upper respiratory infections<br>Chronic lower respiratory diseases<br>Influenza and pneumonia<br>Lung diseases due to external agents<br>Other acute lower respiratory infections<br>Other diseases of pleura<br>Other diseases of the respiratory system<br>Other respiratory diseases principally affecting the interstitial<br>Suppurative and necrotic conditions of lower respiratory tract                                                        |
| Category XI   | Diseases of the digestive system        | Alcoholic liver disease<br>Diseases of appendix<br>Diseases of liver<br>Diseases of esophagus, stomach and duodenum<br>Diseases of oral cavity, salivary glands and jaws<br>Diseases of peritoneum<br>Disorders of gallbladder, biliary tract and pancreas<br>Esophagitis or gastroesophageal                                                                                                                                                                 |

**Supplementary Table 1. Continued**

| Category      | Category name                                                | Disease                                                             |
|---------------|--------------------------------------------------------------|---------------------------------------------------------------------|
|               |                                                              | Hernia                                                              |
|               |                                                              | Noninfective enteritis and colitis                                  |
|               |                                                              | Other diseases of intestines                                        |
|               |                                                              | Other diseases of the digestive system                              |
|               |                                                              | Peptic ulcer or gastrointestinal ulcer                              |
| Category XII  | Diseases of the skin and subcutaneous tissue                 | Bullous disorders                                                   |
|               |                                                              | Dermatitis and eczema                                               |
|               |                                                              | Disorders of skin appendages                                        |
|               |                                                              | Infections of the skin and subcutaneous tissue                      |
|               |                                                              | Other disorders of the skin and subcutaneous tissue                 |
|               |                                                              | Papulosquamous disorders                                            |
|               |                                                              | Radiation-related disorders of the skin and subcutaneous tissue     |
|               |                                                              | Urticaria and erythema                                              |
| Category XIII | Diseases of the musculoskeletal system and connective tissue | Arthrosis                                                           |
|               |                                                              | Chondropathies                                                      |
|               |                                                              | Deforming dorsopathies                                              |
|               |                                                              | Disorders of bone density and structure                             |
|               |                                                              | Disorders of muscles                                                |
|               |                                                              | Disorders of synovium and tendon                                    |
|               |                                                              | Infectious arthropathies                                            |
|               |                                                              | Inflammatory polyarthropathies                                      |
|               |                                                              | Other disorders of the musculoskeletal system and connective tissue |
|               |                                                              | Other dorsopathies                                                  |
|               |                                                              | Other joint disorders                                               |
|               |                                                              | Other osteopathies                                                  |
|               |                                                              | Other soft tissue disorders                                         |
|               |                                                              | Spondylopathies                                                     |
|               |                                                              | Systemic connective tissue disorders                                |
| Category XIV  | Diseases of the genitourinary system                         | Chronic renal disease                                               |
|               |                                                              | Diseases of male genital organs                                     |
|               |                                                              | Disorders of breast                                                 |
|               |                                                              | Glomerular diseases                                                 |
|               |                                                              | Inflammatory diseases of female pelvic organs                       |
|               |                                                              | Noninflammatory disorders of female genital tract                   |
|               |                                                              | Other diseases of urinary system                                    |
|               |                                                              | Other disorders of kidney and ureter                                |
|               |                                                              | Other disorders of the genitourinary system                         |
|               |                                                              | Renal failure                                                       |
|               |                                                              | Renal tubulo-interstitial diseases                                  |
|               |                                                              | Urolithiasis                                                        |
